# Supplementary material for: CellMarkerPipe: cell marker identification and evaluation pipeline in single cell transcriptomes
Source: Sci Rep. 2024 Jun 7;14:13151. doi: 10.1038/s41598-024-63492-z (PMC11161599; doi:10.1038/s41598-024-63492-z)
Supplement: Supplementary file 1 — Supplementary Table S1. [file 41598_2024_63492_MOESM1_ESM.xlsx]

## Sheet: Sheet1
Supplementary Table 1. Computational tools included in this study and cellMarkerPipe.
Tool Name	Year	Institute	Paper PMID	Language	Method	Version if applied	Github Link
Seurat	2022	NYU	34062119	R	FindAllMarkers	4.3.0	https://github.com/satijalab/seurat
COSG	2021	UCAS	35048116	R	cosine distance similarity	0.9.0	https://github.com/genecell/COSGR
SC3	2021	Cambridge	28346451	R	differential expression	1.22.0	https://github.com/hemberg-lab/SC3
SCMarker	2018	MD Anderson	31658262	R	gene relationship	2.0.0	https://github.com/KChen-lab/SCMarker
COMET	2019	Harvard	31657111	python	combinatorial prediction	0.1.13	https://github.com/MSingerLab/COMETSC
scGeneFit	2020	Princeton	33608535	python	label aware dimension reduction	1.0.2	https://github.com/solevillar/scGeneFit-python
