# Supplementary material for: CellMarkerPipe: cell marker identification and evaluation pipeline in single cell transcriptomes
Source: Sci Rep. 2024 Jun 7;14:13151. doi: 10.1038/s41598-024-63492-z (PMC11161599; doi:10.1038/s41598-024-63492-z)
Supplement: Supplementary file 3 — Supplementary Table S3. [file 41598_2024_63492_MOESM3_ESM.xlsx]

## Sheet: All
Supplementary Table 3. The complete results and statistics by different testing cases (as in Figure 2abcd)
S3.1	Testing case by number of total selected marker genes on Zeisel dataset.
S3.2	Testing case by different cell mixture ratios on Jurkat dataset.
S3.3	Testing case by input number of cells on PBMC-10K dataset.
S3.4	Testing case by input number of genes (after global dimension reduction) on PBMC-10K dataset.

## Sheet: SX.1-Fig2a
method	number of selected total marker genes	ari	jaccard	purity	nmi	fmi	precision	recall
COSG	17	0.303003	0.007438	0.826698	0.5459	0.432874	0.333333	0.2
COSG	44	0.37086	0.005913	0.861827	0.600288	0.493155	0.288889	0.433333
COSG	89	0.431903	0.094429	0.846102	0.618835	0.545039	0.233333	0.7
COSG	179	0.397618	0.028399	0.860823	0.612882	0.516604	0.116667	0.7
SC3	17	0.488985	0.049155	0.846437	0.633437	0.589729	0.222222	0.133333
SC3	44	0.42683	0.082455	0.862161	0.628285	0.542399	0.177778	0.266667
SC3	89	0.502604	0.061564	0.870191	0.655465	0.606895	0.111111	0.333333
SC3	179	0.501897	0.069853	0.863499	0.65226	0.603204	0.072222	0.433333
Seurat	22	0.353428	0.010058	0.798595	0.510349	0.471906	0.043478	0.033333
Seurat	44	0.422964	0.009274	0.826698	0.574086	0.535439	0.022222	0.033333
Seurat	89	0.460294	0.064111	0.871863	0.647717	0.571902	0.022222	0.066667
Seurat	179	0.515643	0.070561	0.869522	0.657998	0.614072	0.044444	0.266667
scGeneFit	18	0.048819	0.0277	0.358648	0.133705	0.314578	0.111111	0.066667
scGeneFit	30	0.050584	0.032633	0.382737	0.12688	0.280604	0.066667	0.1
scGeneFit	90	0.478861	0.008273	0.846771	0.628475	0.583349	0.111111	0.333333
scGeneFit	180	0.415008	0.054779	0.877886	0.640154	0.534336	0.083333	0.5
SCMarker	17	0.306844	0.023832	0.814988	0.540513	0.435454	0.388889	0.233333
SCMarker	44	0.395824	0.070332	0.856139	0.608489	0.515708	0.244444	0.366667
SCMarker	89	0.42283	0.123596	0.847441	0.615763	0.53666	0.222222	0.666667
SCMarker	179	0.449648	0.076348	0.877886	0.654213	0.567443	0.122222	0.733333
Comet	18	0.445463	0.010271	0.823687	0.580069	0.552805	0.111111	0.066667
Comet	44	0.47948	0.097204	0.840749	0.624218	0.581734	0.088889	0.133333
Comet	89	0.481082	0.138649	0.850452	0.644549	0.584506	0.066667	0.2
Comet	170	0.488771	0.114313	0.854132	0.650525	0.591679	0.041026	0.266667
High_variable	14	0.321274	0.044978	0.713951	0.484737	0.441254	0.055556	0.033333
High_variable	34	0.361928	0.031692	0.738374	0.53251	0.477711	0.044444	0.066667
High_variable	61	0.448544	0.005414	0.827702	0.605264	0.557586	0.033333	0.1
High_variable	113	0.558813	0.007317	0.873202	0.683607	0.650666	0.033333	0.2
High_variable	168	0.425514	0.057732	0.87086	0.639229	0.543309	0.044444	0.4

## Sheet: SX.2-Fig2b
method	ratio (Jurkat vs 293T)	selected number of marker genes	ari	jaccard	purity	nmi	fmi	precision	recall
COSG	1:1	19	0.313748	0	0.997216	0.526583	0.560089	0.05	0.5
SC3	1:1	19	0.363265	0.050535	0.996381	0.542349	0.602671	0	0
Seurat	1:1	19	0.315129	0.121029	0.964087	0.481841	0.561547	0.05	0.5
SCMarker	1:1	19	0.367198	0.059671	0.980512	0.514296	0.606334	0.05	0.5
scGeneFit	1:1	20	0.359264	0.012396	0.950167	0.468831	0.603768	0	0
Comet	1:1	25	0.306177	0.007154	0.901726	0.382986	0.557363	0	0
COSG	7:3	19	0.218469	0.029838	0.997494	0.454263	0.50057	0.05	0.5
SC3	7:3	19	0.23158	0.035665	0.997772	0.467759	0.514691	0	0
Seurat	7:3	19	0.21981	0.038759	0.99638	0.454086	0.502073	0	0
SCMarker	7:3	19	0.267337	0.064514	0.988026	0.472704	0.552364	0.05	0.5
scGeneFit	7:3	20	0.237861	0.010057	0.957672	0.393634	0.532009	0	0
Comet	7:3	23	0.321169	0.096632	0.962128	0.436296	0.607584	0	0
COSG	8:2	19	0.185489	0.044029	0.996378	0.416639	0.514906	0.05	0.5
SC3	8:2	19	0.194362	0.052131	0.996656	0.431864	0.52575	0.05	0.5
Seurat	8:2	19	0.15752	0.046172	0.980217	0.353368	0.486316	0	0
SCMarker	8:2	19	0.206882	0.064813	0.987183	0.424887	0.546344	0.05	0.5
scGeneFit	8:2	20	0.133871	0.036589	0.962942	0.307473	0.458495	0	0
Comet	8:2	19	0.126137	0.043755	0.915297	0.224151	0.468841	0	0
COSG	9:1	19	0.095118	0.045763	0.995549	0.295094	0.482239	0.05	0.5
SC3	9:1	19	0.081816	0.040168	0.996106	0.276518	0.450425	0.05	0.5
Seurat	9:1	19	0.086748	0.046189	0.98943	0.260961	0.475788	0	0
SCMarker	9:1	19	0.090448	0.051677	0.993602	0.283689	0.4729	0	0
scGeneFit	9:1	20	0.058645	0.040987	0.950209	0.182873	0.440777	0	0
Comet	9:1	21	0.053231	0.029561	0.964951	0.184653	0.405206	0	0

## Sheet: SX.3-Fig2c
method	input number of cells	ari	jaccard	purity	nmi	fmi	precision	recall
COSG	100	0.42468	0.003813	0.561492	0.589873	0.507405	0.1	0.3125
SC3	100	0.35806	0.00061	0.547379	0.670263	0.513487	0.104167	0.3125
Seurat	100	0.36365	0.012112	0.559476	0.671734	0.509978	0.11	0.34375
SCmarker	100	0.455841	0.043334	0.597782	0.643301	0.541004	0.12	0.375
scGeneFit	100	0.458524	0.002836	0.596774	0.668148	0.54783	0.14	0.4375
Comet	100	0.325574	0.01652	0.529234	0.545466	0.438225	0.022388	0.09375
COSG	500	0.4991	0.005766	0.639023	0.578701	0.548364	0.11	0.34375
SC3	500	0.468523	0.126222	0.610775	0.656261	0.550326	0.1	0.3125
Seurat	500	0.470198	0.118302	0.627119	0.648063	0.546426	0.09	0.28125
SCmarker	500	0.509767	0.101345	0.656578	0.639551	0.566932	0.17	0.53125
scGeneFit	500	0.481778	0.0142	0.651937	0.613531	0.537817	0.09	0.28125
Comet	500	0.425875	0.042088	0.637207	0.626801	0.494275	0.033333	0.125
COSG	1500	0.457397	0.004639	0.657154	0.573568	0.509343	0.12	0.375
SC3	1500	0.433805	0.117707	0.590524	0.625555	0.511481	0.1	0.3125
Seurat	1500	0.469248	0.017768	0.656347	0.63799	0.528816	0.09	0.28125
SCmarker	1500	0.501121	0.017881	0.656683	0.641717	0.555747	0.18	0.5625
scGeneFit	1500	0.478517	0.144826	0.634069	0.631432	0.544662	0.12	0.375
Comet	1500	0.428075	0.128043	0.614484	0.600449	0.495191	0.051282	0.1875
COSG	2500	0.474652	0.002584	0.661204	0.574287	0.525009	0.12	0.375
SC3	2500	0.443255	0.122483	0.603608	0.619028	0.515113	0.1	0.3125
Seurat	2500	0.459459	0.003426	0.655473	0.616862	0.517518	0.1	0.3125
SCmarker	2500	0.478363	0.005697	0.666411	0.619225	0.530659	0.19	0.59375
scGeneFit	2500	0.472808	0.123489	0.638804	0.654281	0.551334	0.11	0.34375
Comet	2500	0.378662	0.034643	0.566193	0.541462	0.443474	0.034188	0.125

## Sheet: SX.4-Fig2d
method	input number of genes	ari	jaccard	purity	nmi	fmi	precision	recall
COSG	500	0.501445	0.019235	0.652648	0.607168	0.54965	0.22	0.6875
SC3	500	0.460417	0.017061	0.637149	0.570219	0.511908	0.174603	0.34375
Seurat	500	0.388775	0.007168	0.623708	0.55148	0.446377	0.16	0.5
SCmarker	500	0.485318	0.016729	0.661447	0.612828	0.53434	0.22	0.6875
scGeneFit	500	0.399849	0.020831	0.596626	0.516426	0.456462	0.17	0.53125
Comet	500	0.315322	0.010961	0.553439	0.487893	0.383223	0.07377	0.28125
COSG	1000	0.42048	0.01001	0.619995	0.595644	0.478591	0.16	0.5
SC3	1000	0.460114	0.008357	0.616564	0.594463	0.513989	0.13253	0.34375
Seurat	1000	0.416505	0.016649	0.617937	0.563957	0.47125	0.15	0.46875
SCmarker	1000	0.484801	0.023491	0.663666	0.627375	0.535288	0.21	0.65625
scGeneFit	1000	0.440453	0.017806	0.611761	0.549645	0.49751	0.13	0.40625
Comet	1000	0.356567	0.082627	0.537617	0.498984	0.424368	0.056	0.21875
COSG	3000	0.434665	0.001174	0.653859	0.557859	0.488074	0.12	0.375
SC3	3000	0.46223	0.027321	0.632386	0.612808	0.522742	0.1	0.3125
Seurat	3000	0.45965	0.004152	0.643243	0.61112	0.518135	0.11	0.34375
SCmarker	3000	0.439291	0.012538	0.648894	0.60525	0.495245	0.19	0.59375
scGeneFit	3000	0.391177	0.081423	0.567565	0.532134	0.456292	0.1	0.3125
Comet	3000	0.398893	0.011391	0.596908	0.550641	0.457161	0.039683	0.15625
COSG	5000	0.441487	0.025193	0.664877	0.574906	0.494802	0.12	0.375
SC3	5000	0.471364	0.111645	0.613335	0.591805	0.524171	0.1	0.3125
Seurat	5000	0.443985	0.013057	0.652406	0.609451	0.504621	0.1	0.3125
SCmarker	5000	0.418926	0.057518	0.648733	0.611857	0.478813	0.19	0.59375
scGeneFit	5000	0.475795	0.129034	0.636947	0.633932	0.543776	0.11	0.34375
Comet	5000	0.375214	0.005479	0.577615	0.536931	0.439274	0.034188	0.125
