# Supplementary material for: CellMarkerPipe: cell marker identification and evaluation pipeline in single cell transcriptomes
Source: Sci Rep. 2024 Jun 7;14:13151. doi: 10.1038/s41598-024-63492-z (PMC11161599; doi:10.1038/s41598-024-63492-z)
Supplement: Supplementary file 6 — Supplementary Table S6. [file 41598_2024_63492_MOESM6_ESM.xlsx]

## Sheet: Sheet1
Supplementary Table 6. Parameters and statistics in running the pipeline and in method comparison
Dataset Name	sub group	# of group	max.RNA	min.RNA	max.mt	# cell	original # cell	# of high variable genes	original # genes	comment	missing markers
PBMC-10K		10	2500	200	5	93883	94626	5000	19403	add marker genes CD27, CD3D after dimension reduction and bring the total number of genes to 5002
Zeisel		9	2500	200	5	2989	3005	2000	4998
Jurkat	Jurkat-293T	2	6000	200	10	3592	3600	2000	16993
Plant		7	5000	200	5	11718	12198	5000	17706	add marker genes AT3G54220, AT2G01830, AT2G27030 after dimension reduction and bring the total number of genes to 5003
HumanGut	Colon	7	8000	200	50	4472	4472	4000	17337	add marker genes ALPI, FABP2, MUC4 after dimension reduction and bring the total number of genes to 4003
	Ileum	7	8000	200	50	6167	6167	4000	17284	add marker genes ALPI, TMEM37 after dimension reduction and bring the total number of genes to 4002
	Rectum	7	8000	200	50	3897	3898	4000	17797
MiceGut	Duodenum	8	3000	200	5	3927	3927	4000	13834	add marker genes Olfm4, Slc12a2, Mep1a after dimension reduction and bring the total number of genes to 4003
	Ileum	8	3000	200	5	3768	3768	4000	13782	add marker genes Olfm4, Defa24, Cbr1 after dimension reduction and bring the total number of genes to 4003
	Jejunum	8	3000	200	5	3970	3970	4000	13761	add marker genes Olfm4 after dimension reduction and bring the total number of genes to 4001
GeneEditing	unedited	12	4000	100	10	1906	1906	4000	18105
	modified	12	4000	100	10	2958	2958	4000	17427	add marker genes CTLA4 after dimension reduction and bring the total number of genes to 4001
